# Supplementary material for: Direct measurement of pervasive weak repression by microRNAs and their role at the network level
Source: PubMed Central journal article supplement (PMC5952853; doi:10.1186/s12864-018-4757-z), 2018-05-15
Supplement: 12864_2018_4757_MOESM3_ESM.pdf [file 12864_2018_4757_MOESM3_ESM.pdf]

Table S1. Relating mRNA stability to gene function using a Gene Ontology (GO) analysis in the WT line (the 200 least stable genes)

| GO term                                               | P value  | FDR      |
|-------------------------------------------------------|----------|----------|
| Biological process                                    |          |          |
| chitin-based cuticle development                      | 2.34E-12 | 1.74E-08 |
| cuticle development                                   | 6.25E-10 | 2.32E-06 |
| cellular macromolecule metabolic process              | 3.85E-07 | 9.51E-04 |
| Molecular function                                    |          |          |
| structural constituent of chitin-based larval cuticle | 1.97E-13 | 5.20E-10 |
| structural constituent of chitin-based cuticle        | 7.02E-13 | 9.25E-10 |
| structural constituent of cuticle                     | 1.55E-12 | 1.36E-09 |
| structural molecule activity                          | 2.11E-05 | 1.39E-02 |
| Cellular component                                    |          |          |
| extracellular matrix                                  | 6.61E-11 | 8.36E-08 |
| extracellular region part                             | 2.39E-05 | 4.31E-03 |
| extracellular region                                  | 8.56E-07 | 3.61E-04 |
| membrane-bounded organelle                            | 1.30E-04 | 1.83E-02 |
| organelle                                             | 8.58E-05 | 1.36E-02 |
| intracellular organelle part                          | 3.29E-06 | 8.33E-04 |
| intracellular part                                    | 4.17E-04 | 4.79E-02 |
| intracellular organelle                               | 1.56E-04 | 1.98E-02 |
| organelle part                                        | 1.63E-05 | 3.45E-03 |
| protein complex                                       | 2.00E-06 | 6.33E-04 |
| macromolecular complex                                | 8.50E-09 | 5.37E-06 |

Significant GO terms and relevant P values and FDR (False Discovery rate) are shown. FDR cutoff = 0.05.
