# Supplementary material for: Direct measurement of pervasive weak repression by microRNAs and their role at the network level
Source: PubMed Central journal article supplement (PMC5952853; doi:10.1186/s12864-018-4757-z), 2018-05-15
Supplement: 12864_2018_4757_MOESM4_ESM.pdf [file 12864_2018_4757_MOESM4_ESM.pdf]

Table S2. Relating mRNA stability to gene function using a Gene Ontology (GO) analysis in the WT line (the 200 most stable genes)

| GO term                                         |          |          | Continued                                    |          |          |
|-------------------------------------------------|----------|----------|----------------------------------------------|----------|----------|
| Biological process                              | P value  | FDR      | intracellular part                           | 1.03E-04 | 6.84E-03 |
| cytoplasmic translation                         | 3.71E-14 | 2.75E-10 | intracellular                                | 1.06E-04 | 6.70E-03 |
| translation                                     | 2.57E-11 | 9.55E-08 | cell part                                    | 3.23E-04 | 1.86E-02 |
| cellular protein metabolic process              | 1.44E-06 | 9.72E-04 | cell                                         | 3.23E-04 | 1.94E-02 |
| protein metabolic process                       | 9.18E-05 | 3.58E-02 | ferritin complex                             | 1.00E-03 | 4.86E-02 |
| cellular macromolecule metabolic process        | 4.99E-06 | 2.64E-03 | protein complex                              | 8.68E-04 | 4.58E-02 |
| cellular process                                | 3.60E-05 | 1.57E-02 | macromolecular complex                       | 7.83E-07 | 9.01E-05 |
| cellular macromolecule biosynthetic process     | 5.42E-07 | 4.46E-04 | cytosolic large ribosomal subunit            | 7.55E-12 | 3.18E-09 |
| macromolecule biosynthetic process              | 9.42E-07 | 6.99E-04 | cytosolic part                               | 5.72E-12 | 3.62E-09 |
| organic substance biosynthetic process          | 1.18E-05 | 5.49E-03 | cytosol                                      | 3.24E-08 | 5.12E-06 |
| biosynthetic process                            | 8.67E-06 | 4.29E-03 | cytoplasmic part                             | 5.08E-09 | 1.07E-06 |
| cellular biosynthetic process                   | 4.37E-06 | 2.49E-03 | cytoplasm                                    | 3.55E-05 | 2.99E-03 |
| peptide biosynthetic process                    | 3.53E-11 | 8.73E-08 | large ribosomal subunit                      | 6.64E-09 | 1.20E-06 |
| peptide metabolic process                       | 1.24E-10 | 1.85E-07 | ribosomal subunit                            | 9.63E-11 | 2.44E-08 |
| cellular amide metabolic process                | 8.80E-10 | 1.09E-06 | intracellular organelle part                 | 2.96E-05 | 2.67E-03 |
| cellular nitrogen compound metabolic process    | 2.53E-06 | 1.56E-03 | intracellular organelle                      | 4.92E-05 | 3.89E-03 |
| organonitrogen compound biosynthetic process    | 5.27E-08 | 5.59E-05 | organelle                                    | 5.21E-05 | 3.87E-03 |
| amide biosynthetic process                      | 8.29E-11 | 1.54E-07 | organelle part                               | 7.24E-05 | 5.09E-03 |
| cellular nitrogen compound biosynthetic process | 5.75E-08 | 5.33E-05 | intracellular ribonucleoprotein complex      | 1.46E-06 | 1.42E-04 |
| gene expression                                 | 3.87E-05 | 1.60E-02 | ribonucleoprotein complex                    | 1.46E-06 | 1.54E-04 |
| ribosome assembly                               | 1.27E-04 | 4.72E-02 | ribosome                                     | 2.83E-11 | 8.96E-09 |
| Molecular function complete                     |          |          | intracellular non-membrane-bounded organelle | 4.53E-07 | 6.37E-05 |
| structural constituent of ribosome              | 4.83E-11 | 1.27E-07 | non-membrane-bounded organelle               | 4.53E-07 | 5.74E-05 |
| structural molecule activity                    | 7.85E-06 | 6.89E-03 | cytosolic ribosome                           | 2.40E-14 | 3.03E-11 |
| RNA binding                                     | 7.35E-07 | 9.68E-04 | cytosolic small ribosomal subunit            | 3.90E-04 | 2.15E-02 |
| Cellular component complete                     |          |          |                                              |          |          |
| intracellular ferritin complex                  | 1.00E-03 | 5.06E-02 |                                              |          |          |

Significant GO terms and relevant P values and FDR (False Discovery rate) are shown. FDR cutoff = 0.05.
