# Supplementary material for: Direct measurement of pervasive weak repression by microRNAs and their role at the network level
Source: PubMed Central journal article supplement (PMC5952853; doi:10.1186/s12864-018-4757-z), 2018-05-15
Supplement: 12864_2018_4757_MOESM6_ESM.pdf [file 12864_2018_4757_MOESM6_ESM.pdf]

Table S3. The decay rates of three targets that belong to the RNA binding protein (RBP) family

| Targeting genes | Targeting transcripts | Decay rates for WT | Decay rates for KO |
|-----------------|-----------------------|--------------------|--------------------|
| Rb97D (CG6354)  | FBtr0100340           | 0.15               | 0.13               |
| CG4119          | FBtr0070799           | 0.23               | 0.18               |
| CG4896          | FBtr0335394           | 0.24               | 0.23               |
