# Supplementary material for: Direct measurement of pervasive weak repression by microRNAs and their role at the network level
Source: PubMed Central journal article supplement (PMC5952853; doi:10.1186/s12864-018-4757-z), 2018-05-15
Supplement: 12864_2018_4757_MOESM9_ESM.pdf [file 12864_2018_4757_MOESM9_ESM.pdf]

Table S4. Real-time polymerase chain reaction primers used for mRNA quantification.

| <b>Gene</b> | <b>Forward primer</b> | <b>Reverse primer</b> |
|-------------|-----------------------|-----------------------|
| Jra         | AAGCAAAGTTCCCACCCACT  | GGATTCGGGGTGGATGTGTT  |
| Mef2        | CAAGCTGTACCAGTACGCCA  | GTTTCGCGGAGTGAGTGTGTA |
| Mad         | GACGAAGAGGAGAAGTGGGC  | GGGAGACCTGTAATCGTCCG  |
| Ps          | ACGGGTGCTAGGGTCAAGAT  | CGACCATGATAGCCTCCGTG  |
| Twin        | TGCCACATCCGCATATACC   | TGGCTAGCCGTATGCATCAG  |
| Nop60B      | AAGACTGGCTTCATCAACCTG | GCAACCCGTGACTTTGGGA   |
| Notch       | CGCTTCCTGCACAAGTGTC   | GCGCAGTAGGTTTTGCCATT  |
| Sqd         | GGTCGATGTTAAGCGTGCGA  | GTCCGTCCCCTGTTGTT     |
| RP49        | ATGCTAAGCTGTCGCACAAA  | GTTTCGATCCGTAACCGATGT |
